# Supplementary material for: Choice of DNA extraction method affects detection of bacterial taxa from retail chicken breast
Source: PubMed Central journal article supplement (PMC9524001; doi:10.1186/s12866-022-02650-7), 2022-09-30
Supplement: 12866_2022_2650_MOESM2_ESM.pdf [file 12866_2022_2650_MOESM2_ESM.pdf]

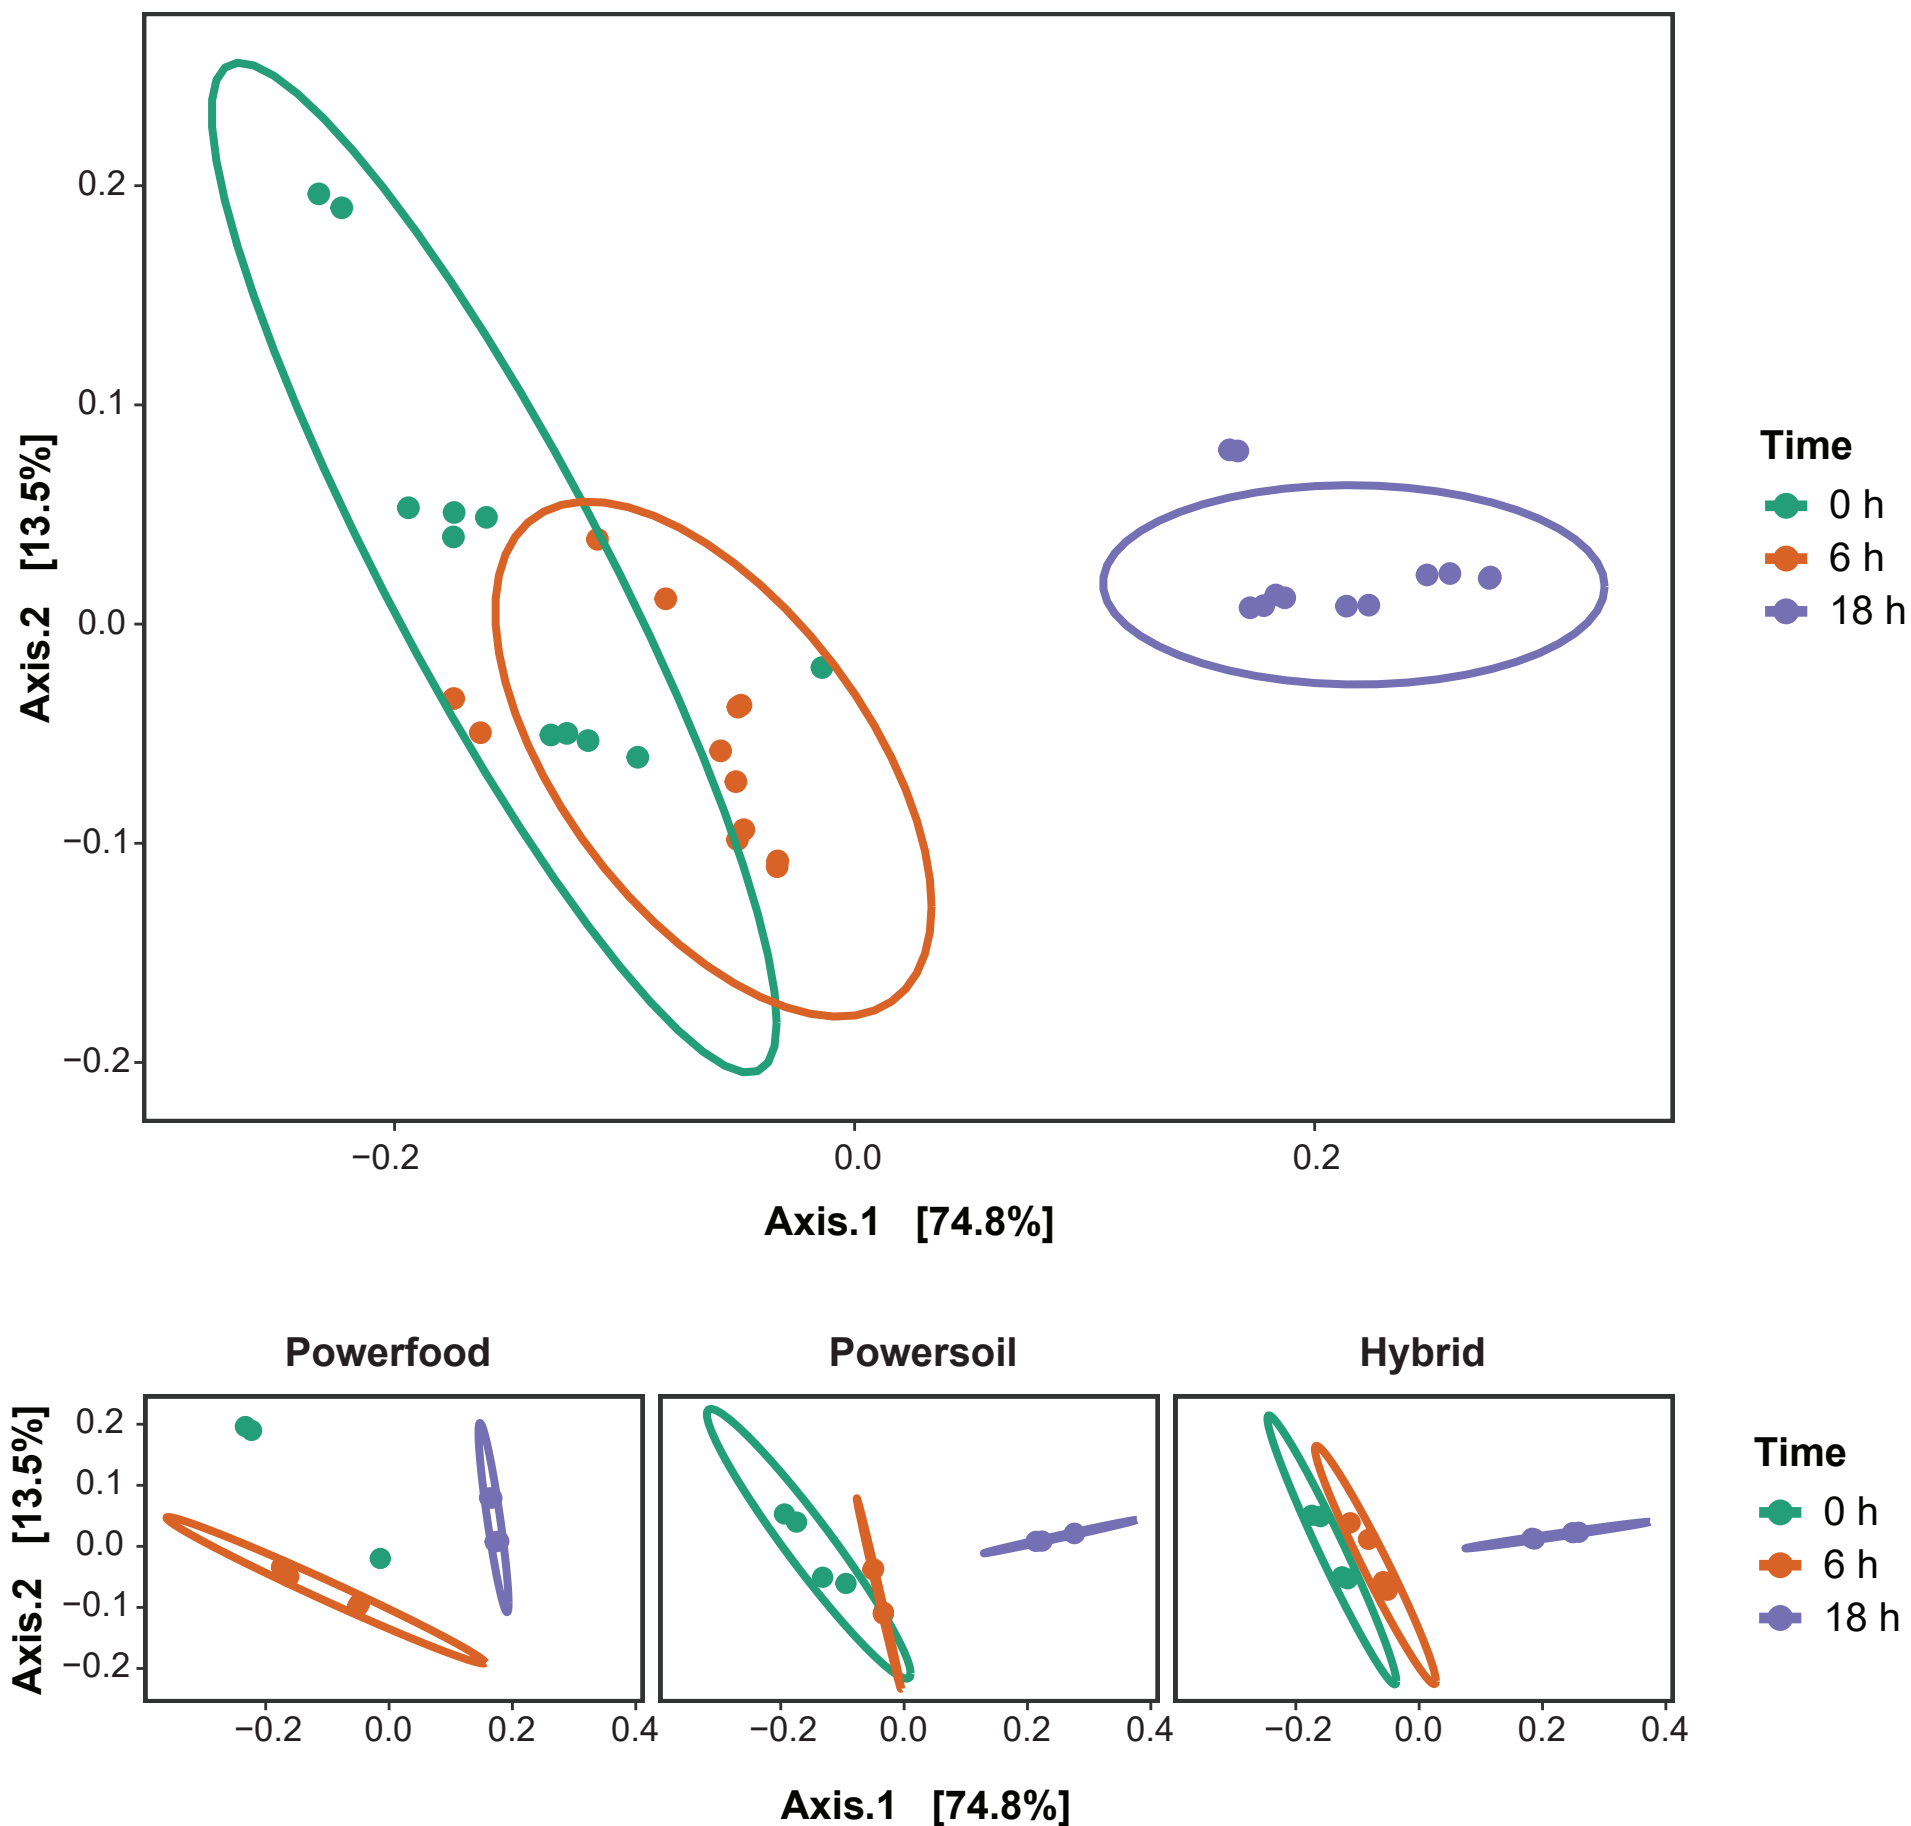

Supplementary Figure 2. **Microbial composition is altered by enrichment time.** Principal co-ordinate analysis of weighted Unifrac distances for all 16S samples (upper panel) and 16S samples by DNA extraction kit (lower panel). Ellipses represent 95% confidence regions.
